# Supplementary material
Source: publisher figshare collection journal article supplement (https://tandf.figshare.com/articles/dataset/_/12909630)
Supplement: Supplementary file 1 [file 1]

| 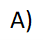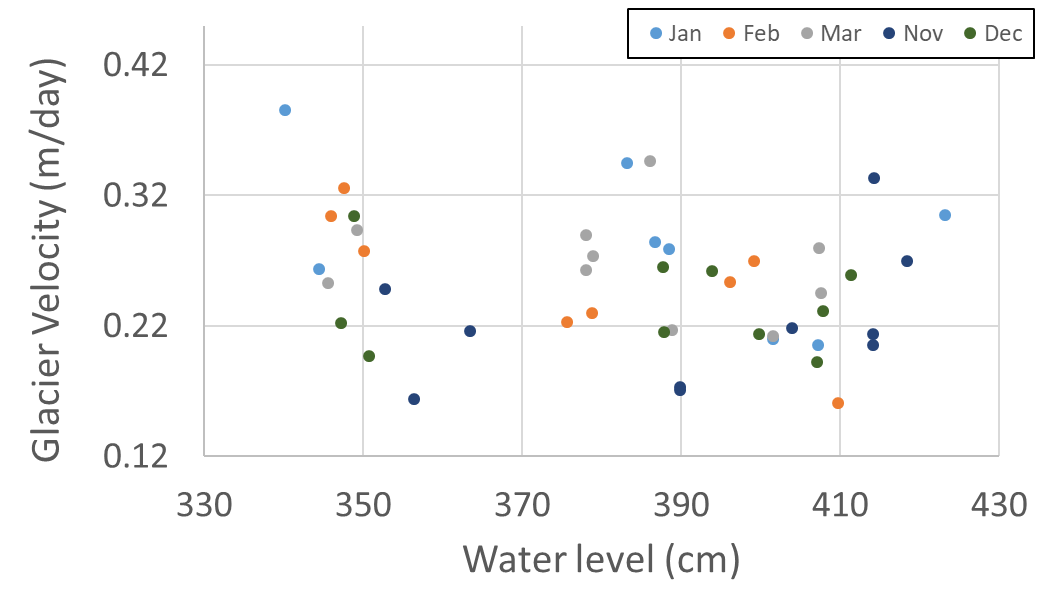 |
| --- |
| 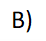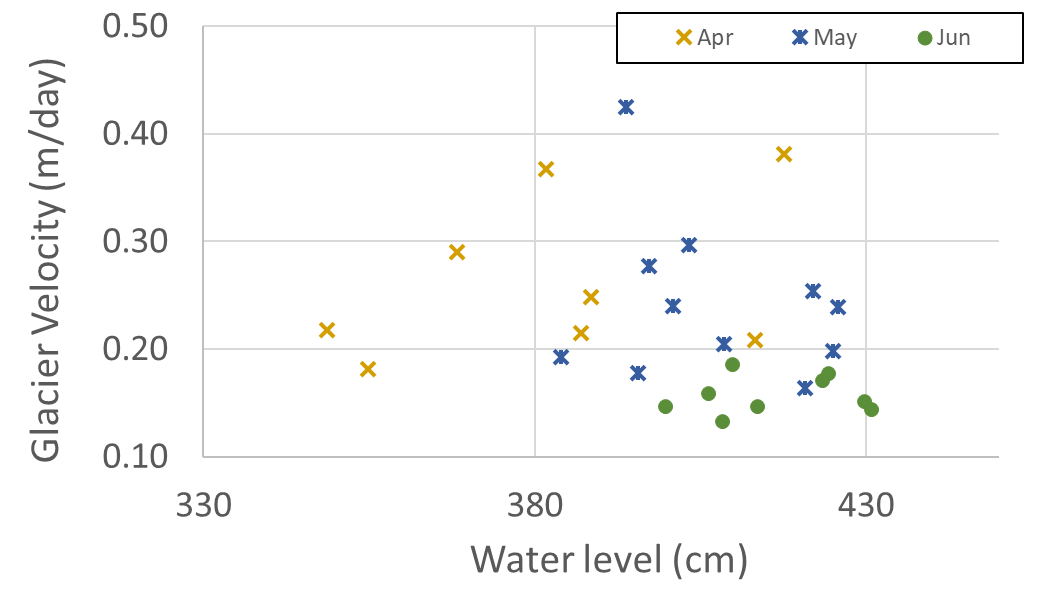 |
| 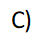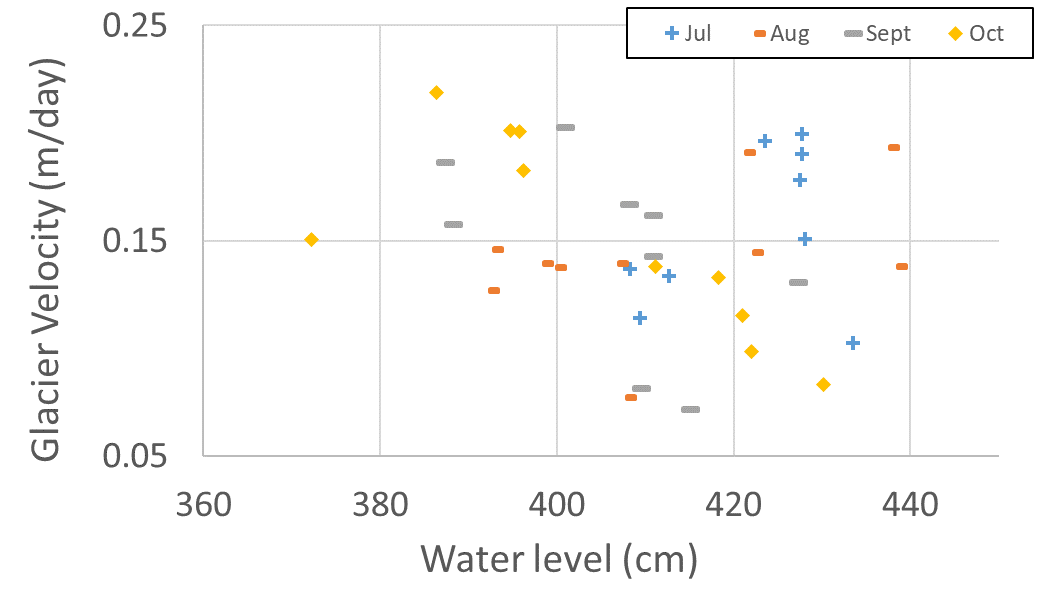 |

**Figure S5**. Plot of mean velocity estimates (m/day) of the Solheimajoküll (y-axis) and water level (cm) of the Jökulsá á Sólheimasandi river (x-axis) for 2016, 2017 and 2018. For the sake of clarity, velocity estimates are plotted by months and separated in three different charts -A) winter background velocity; B) acceleration; C) deceleration- based on the most typical fluvial trends of Jökulsá á Sólheimasandi across the year.
